# Supplementary material
Source: PubMed Central journal article supplement (PMC6785993)

Figure S3

A

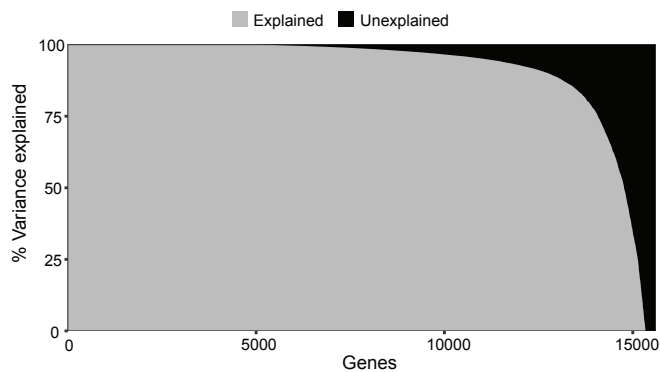

B

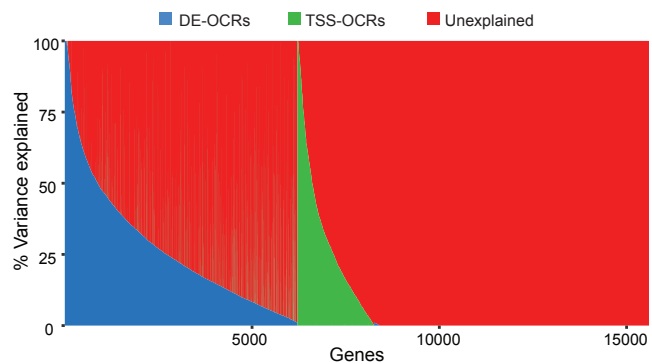

C

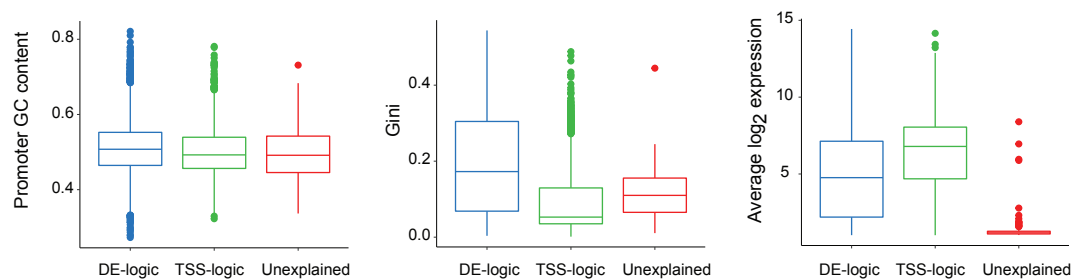

D

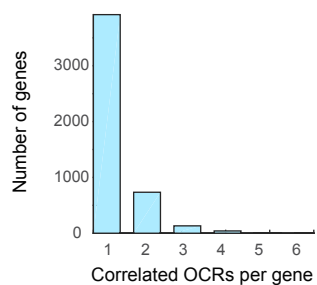

Supplement: NIHMS1538358-supplement-3.pdf [file NIHMS1538358-supplement-3.pdf]

Figure S4

A

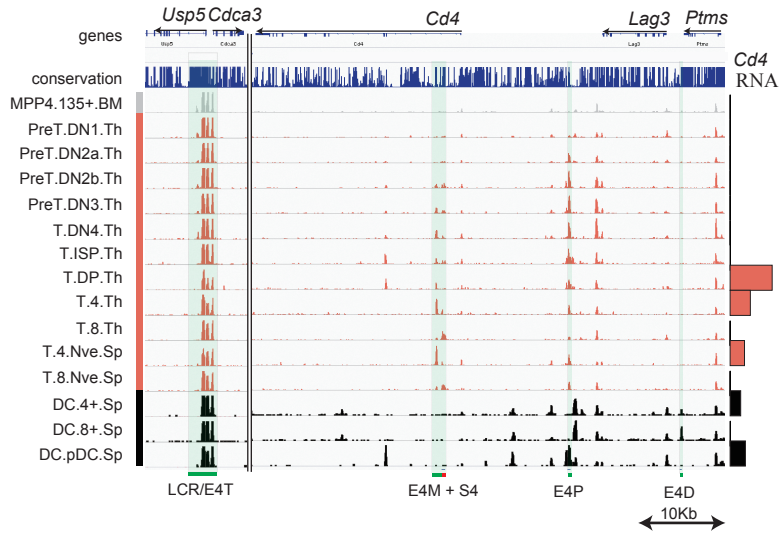

B

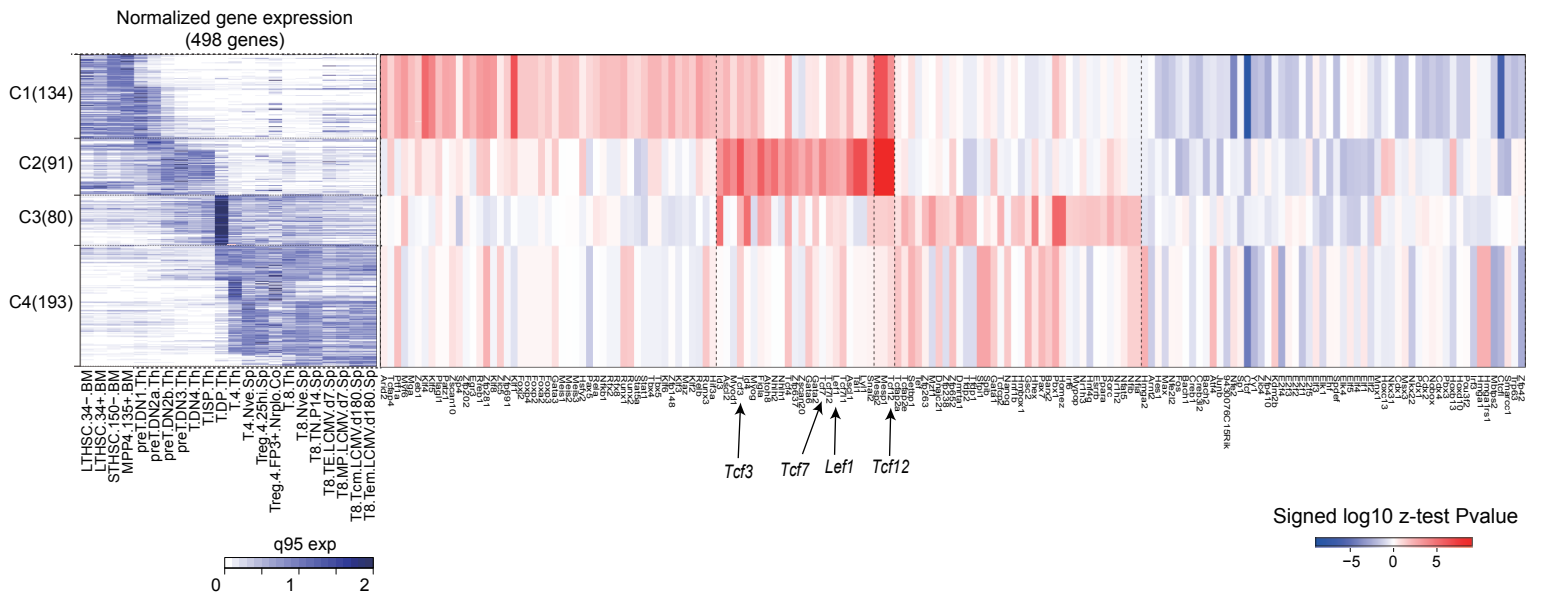

Supplement: NIHMS1538358-supplement-4.pdf [file NIHMS1538358-supplement-4.pdf]

Figure S5

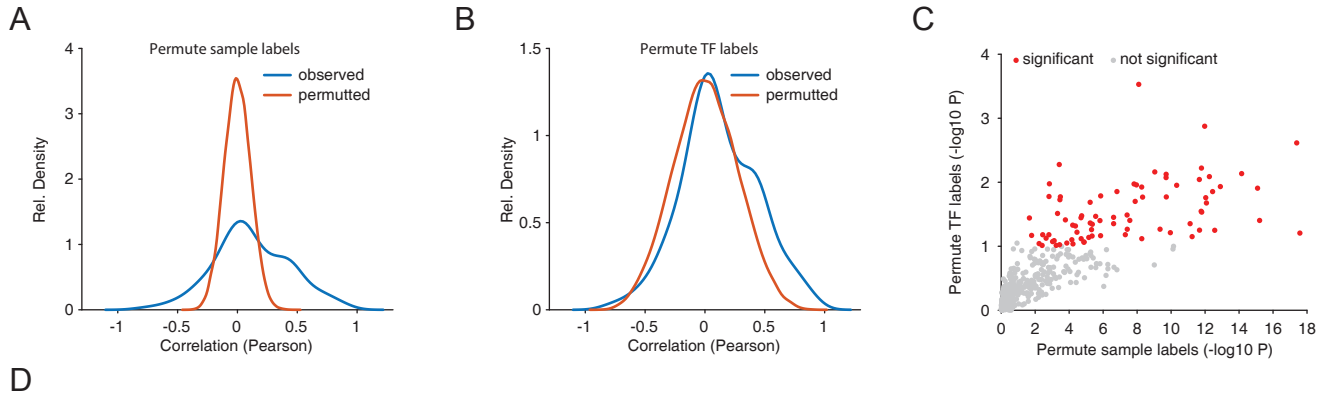

**D**

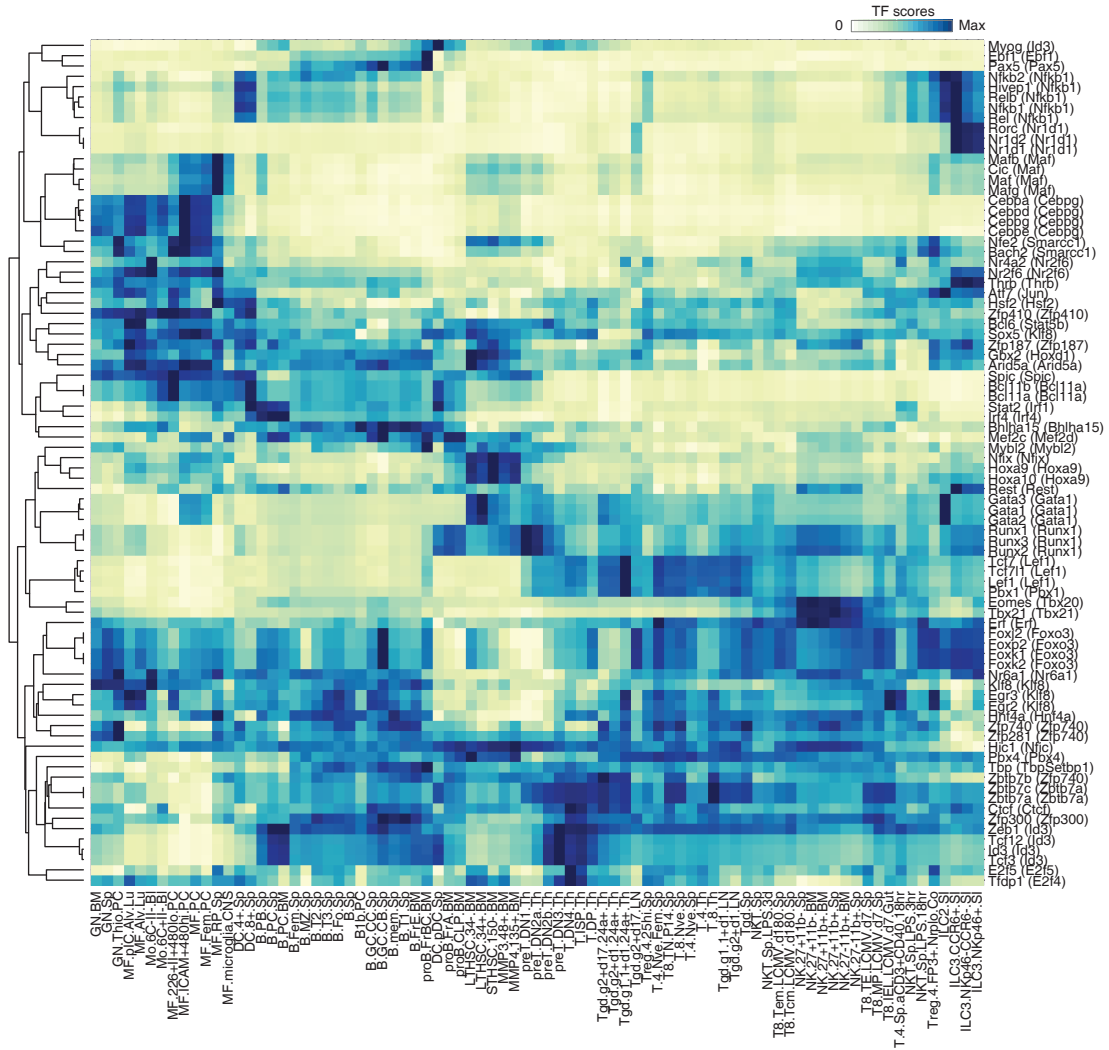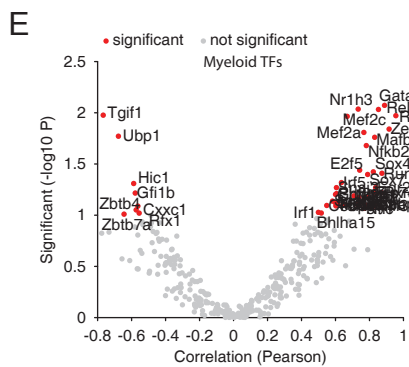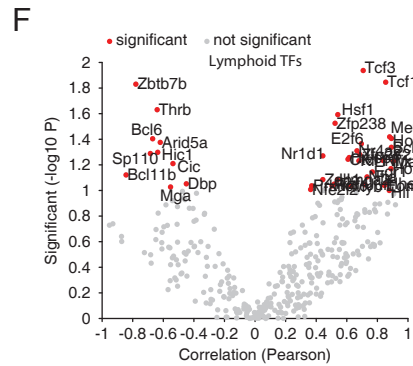

Supplement: NIHMS1538358-supplement-5.pdf [file NIHMS1538358-supplement-5.pdf]

Figure S7

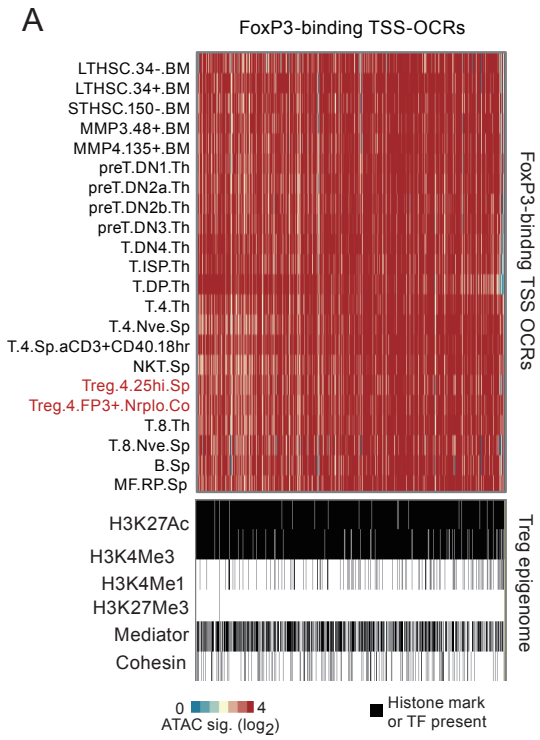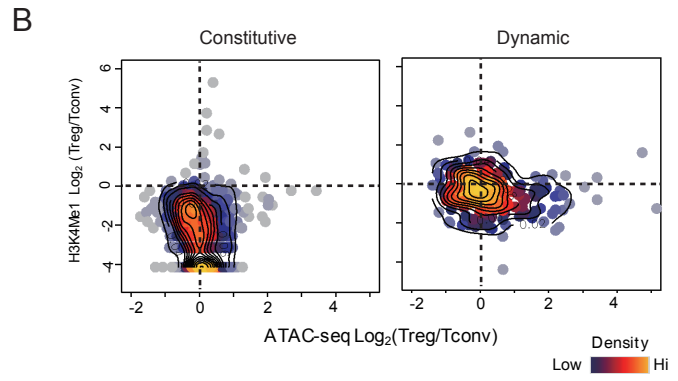

Supplement: NIHMS1538358-supplement-7.pdf [file NIHMS1538358-supplement-7.pdf]
